# Supplementary material for: A Global Lake/Reservoir Surface Extent Dataset (GLRSED): An integration of HydroLAKES, GRanD and OpenStreetMap
Source: Copernicus journal article supplement (doi:10.5194/essd-2023-216), 2023-07-14
Supplement: Supplementary file 1 [file essd-2023-216-supplement.pdf]

## Supplementary materials

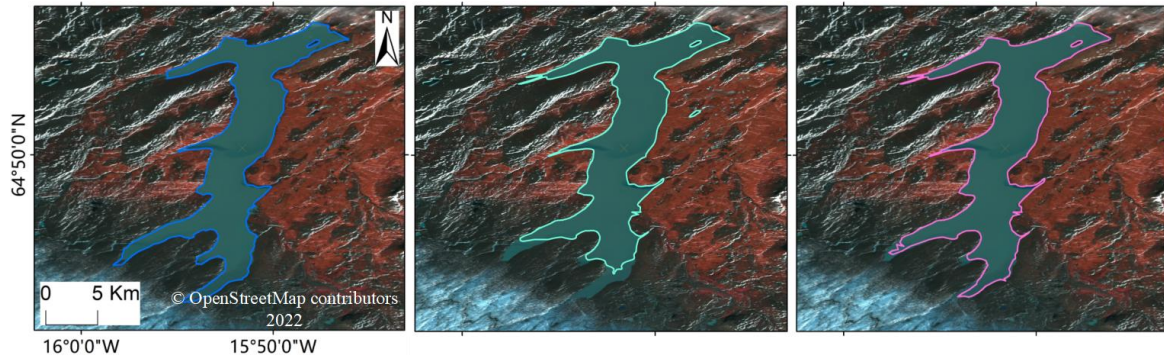

5

(a) OpenStreetMap

(b) HydroLAKES

(c) GRanD

Figure S1. An example of inconsistent spatial range of a lake in OSM and HydroLAKES and GRanD. © OpenStreetMap contributors 2022. Distributed under the Open Data Commons Open Database License (ODbL) v1.0.

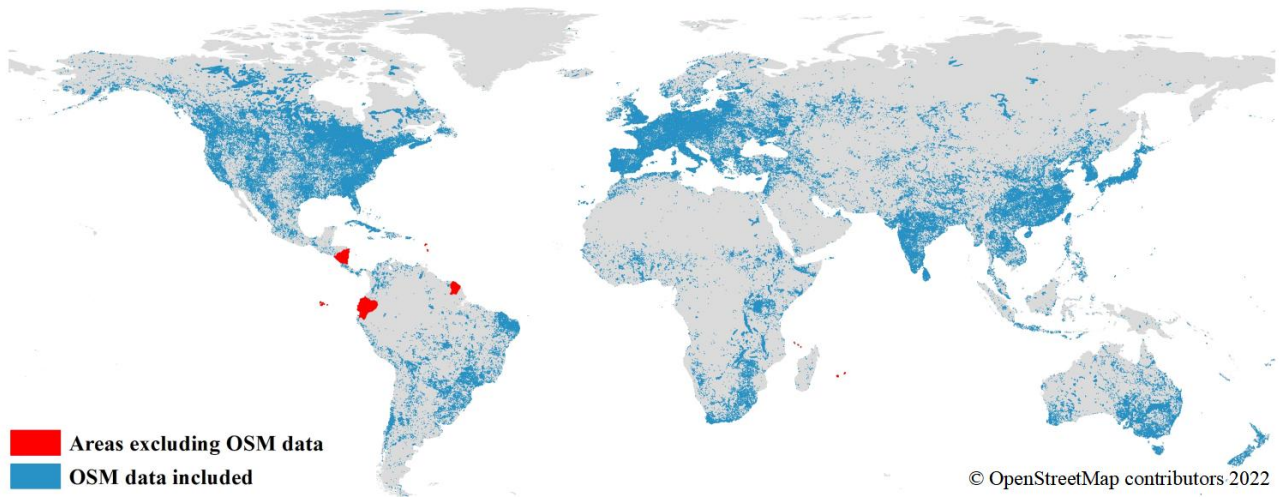

10

Figure S2. OSM data range not included in GLRSED. © OpenStreetMap contributors 2022. Distributed under the Open Data Commons Open Database License (ODbL) v1.0.

15 **Table S1. Summary of the datasets used in the products of GLRSED.**

| <b>Dataset</b>                                                              | <b>Source</b>                                                                                                                           | <b>Contribution</b>           |
|-----------------------------------------------------------------------------|-----------------------------------------------------------------------------------------------------------------------------------------|-------------------------------|
| Mountain (Korner et al., 2017)                                              | <a href="https://ilias.unibe.ch/goto_ilias3_unibe_file_1047348.html">https://ilias.unibe.ch/goto_ilias3_unibe_file_1047348.html</a>     | Identify mountain lakes       |
| HydroBASINS (Lehner & Grill, 2013)                                          | <a href="https://www.hydrosheds.org/products/hydrobasins">https://www.hydrosheds.org/products/hydrobasins</a>                           | Identify the endorheic lakes  |
| Global GeOreferenced Database of Dams (GOODD) (Mulligan et al., 2020)       | <a href="http://tiny.cc/GOOD2ScientificData">http://tiny.cc/GOOD2ScientificData</a>                                                     | Identify reservoirs           |
| Georeferenced global Dams And Reservoirs (GeoDAR) (Wang et al., 2022)       | <a href="https://doi.org/10.5281/zenodo.6163413">https://doi.org/10.5281/zenodo.6163413</a>                                             | Identify reservoirs           |
| SWOT River Database (SWORD) (Altenau et al., 2021)                          | <a href="https://zenodo.org/record/3898569">https://zenodo.org/record/3898569</a>                                                       | Identify lakes on the river   |
| Randolph Glacier Inventory 6.0 (RGI 6.0) glacier data (Rignot et al., 2014) | <a href="https://www.glims.org/RGI/rgi60_dl.html">https://www.glims.org/RGI/rgi60_dl.html</a>                                           | Identify glacier-fed lakes    |
| Permafrost distribution data                                                | <a href="https://neo.gsfc.nasa.gov/view.php?datasetId=PermafrostNSIDC">https://neo.gsfc.nasa.gov/view.php?datasetId=PermafrostNSIDC</a> | Identify permafrost-fed lakes |

25 Table S2. The area distribution characteristics of lakes/reservoirs in GLRSED.

|                                  | Area/km <sup>2</sup> |                               |             |             |             |             |             |             |
|----------------------------------|----------------------|-------------------------------|-------------|-------------|-------------|-------------|-------------|-------------|
|                                  | Total                | Area interval/km <sup>2</sup> |             |             |             |             |             |             |
|                                  |                      | ≤1                            | (1,10]      | (10,100]    | (100,200]   | (200,500]   | (500,1000]  | > 1000      |
| <b>Continent</b>                 |                      |                               |             |             |             |             |             |             |
| <b>North America (NA)</b>        | 1338426.69           | 238318.9493                   | 246445.154  | 201819.9311 | 56137.99471 | 77461.6361  | 46828.10755 | 471414.9173 |
| <b>Europe (EU)</b>               | 236074.341           | 29880.49156                   | 42873.6163  | 42705.93255 | 11050.32652 | 18373.02856 | 13247.87585 | 77943.06968 |
| <b>Asia (AS)</b>                 | 982963.7389          | 69294.78659                   | 109627.7878 | 105224.5923 | 31043.28999 | 52152.34067 | 38198.0312  | 577422.9103 |
| <b>South America (SA)</b>        | 155679.0442          | 15324.71931                   | 22328.23708 | 26460.55369 | 10463.48472 | 15038.06657 | 15671.13724 | 50392.84561 |
| <b>Africa (AF)</b>               | 277538.8052          | 4706.273394                   | 7239.576697 | 13269.81673 | 8528.396997 | 13224.24828 | 11696.73701 | 218873.7561 |
| <b>Oceania (OC)</b>              | 90132.09421          | 3754.826046                   | 7457.528163 | 15024.83254 | 8549.869581 | 10336.48051 | 8849.141161 | 36159.41621 |
| <b>Countries with most lakes</b> |                      |                               |             |             |             |             |             |             |
| <b>Canada</b>                    | 903010.2151          | 206359.4479                   | 206597.0828 | 156955.3717 | 40260.63558 | 59557.27748 | 36364.53801 | 196915.8617 |
| <b>Russia</b>                    | 716297.7962          | 54709.79967                   | 80528.13995 | 48603.40599 | 10111.31297 | 14780.1454  | 13478.77093 | 494086.2213 |
| <b>USA</b>                       | 396215.0051          | 29196.56325                   | 31692.52452 | 34423.52151 | 13043.63982 | 15031.32062 | 8236.345552 | 264591.0898 |
| <b>China</b>                     | 119722.0969          | 7877.448611                   | 16076.9255  | 30927.00357 | 11772.59413 | 18459.48616 | 14181.14868 | 20427.49022 |
| <b>Tanzania</b>                  | 111192.2217          | 86.52753129                   | 293.7699397 | 496.7022434 | 226.2325194 | 973.3126468 | 2259.088261 | 106856.5885 |
| <b>Australia</b>                 | 86036.7725           | 3534.774801                   | 7054.440959 | 13827.24997 | 7528.494659 | 9697.572901 | 8234.823009 | 36159.41621 |
